# Supplementary material for: Carboxyl truncation of α-synuclein occurs early and is influenced by human APOE genotype in transgenic mouse models of α-synuclein pathogenesis
Source: PubMed Central journal article supplement (PMC10363304; doi:10.1186/s40478-023-01623-9), 2023-07-23
Supplement: 40478_2023_1623_MOESM1_ESM.pdf [file 40478_2023_1623_MOESM1_ESM.pdf]

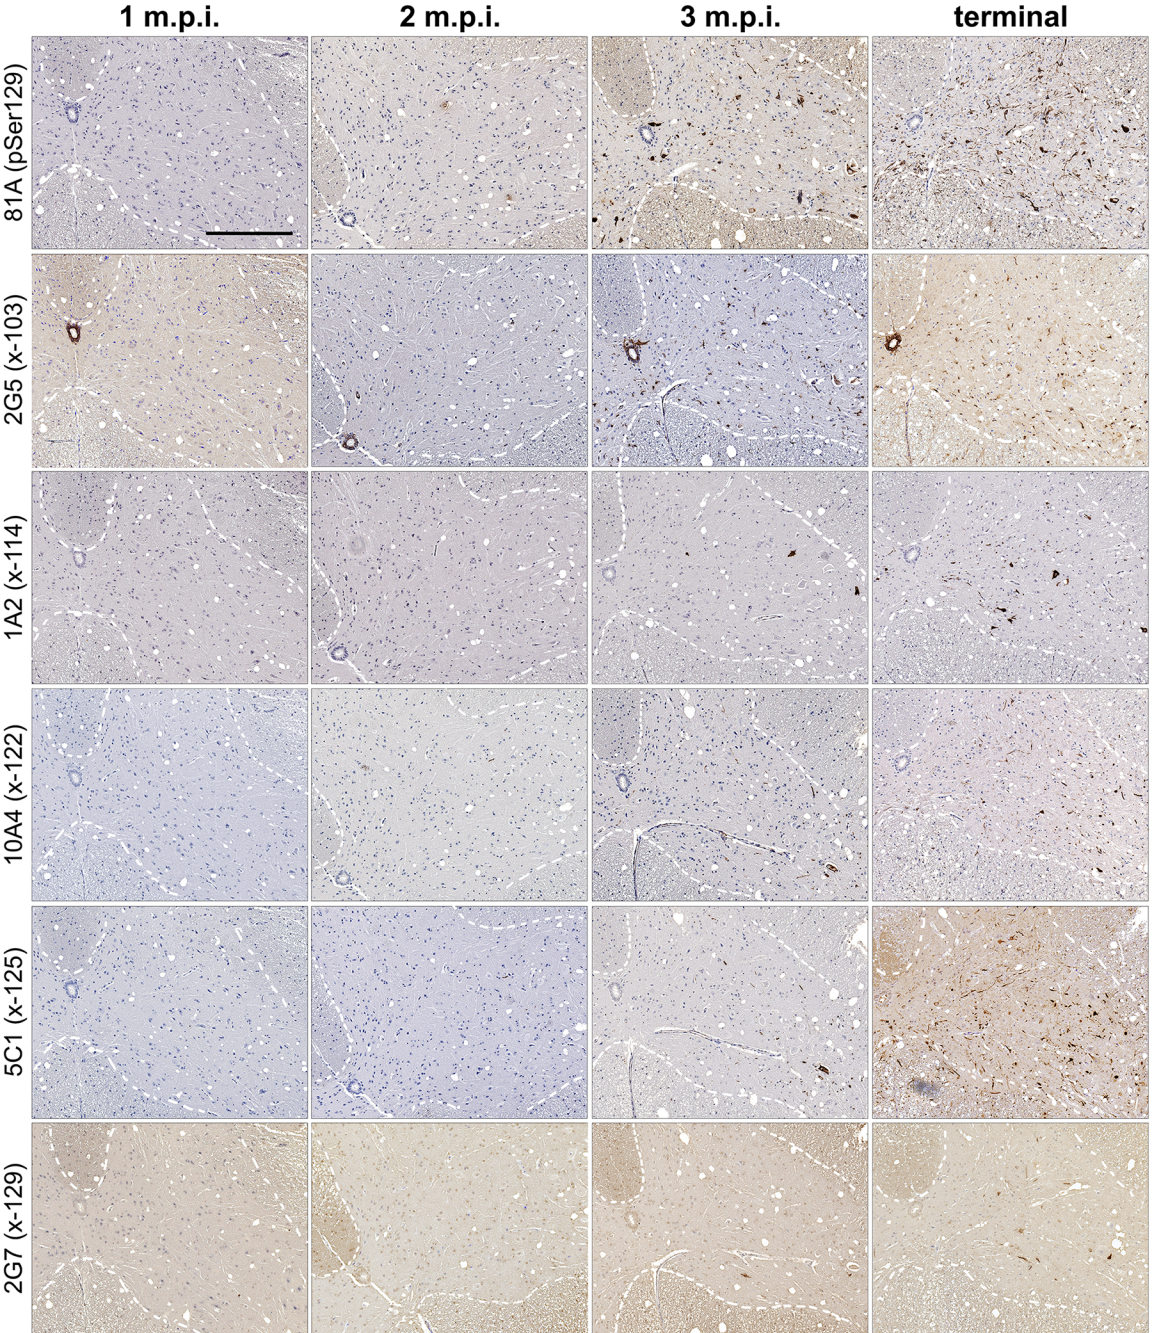

**Supplemental Figure 1**

APOE  $\epsilon 3^{+/+}/M83^{+/-}$ APOE  $\epsilon 4^{+/+}/M83^{+/-}$ 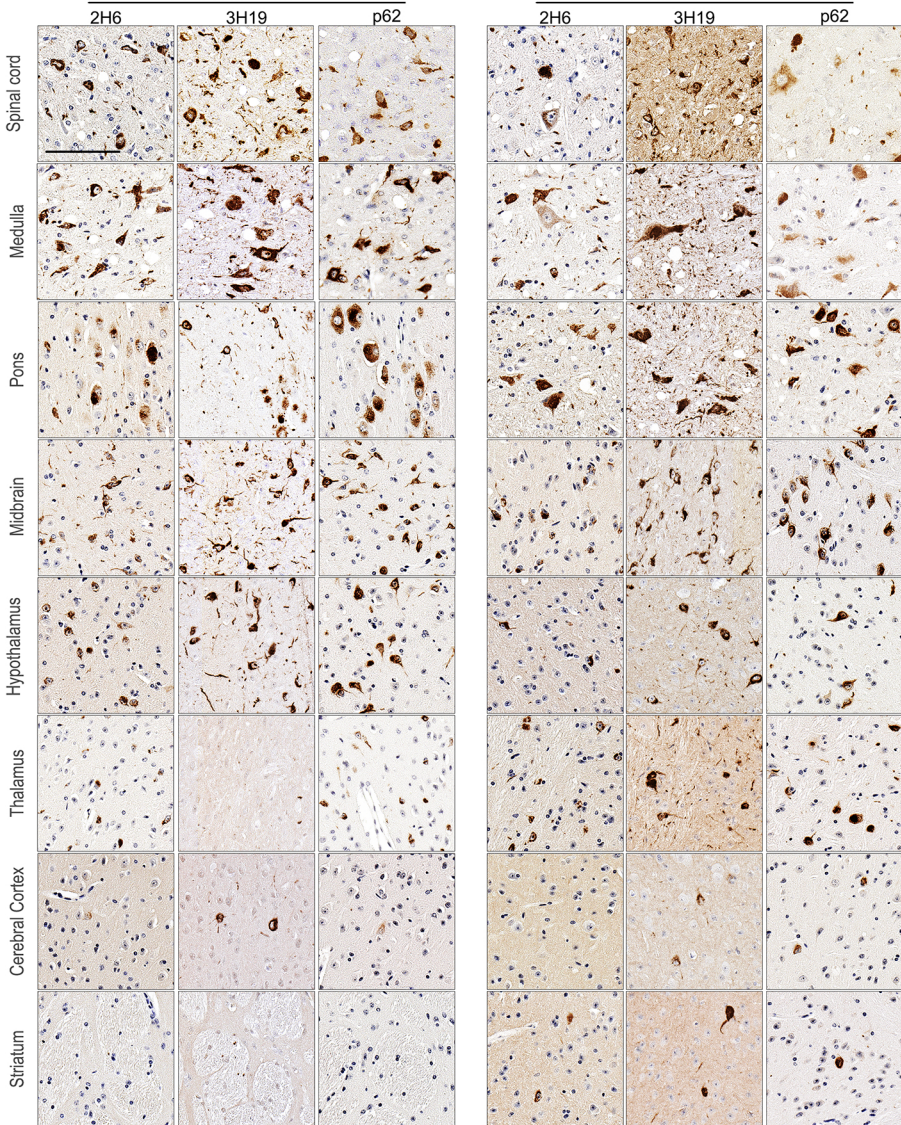**Supplemental Figure 2**

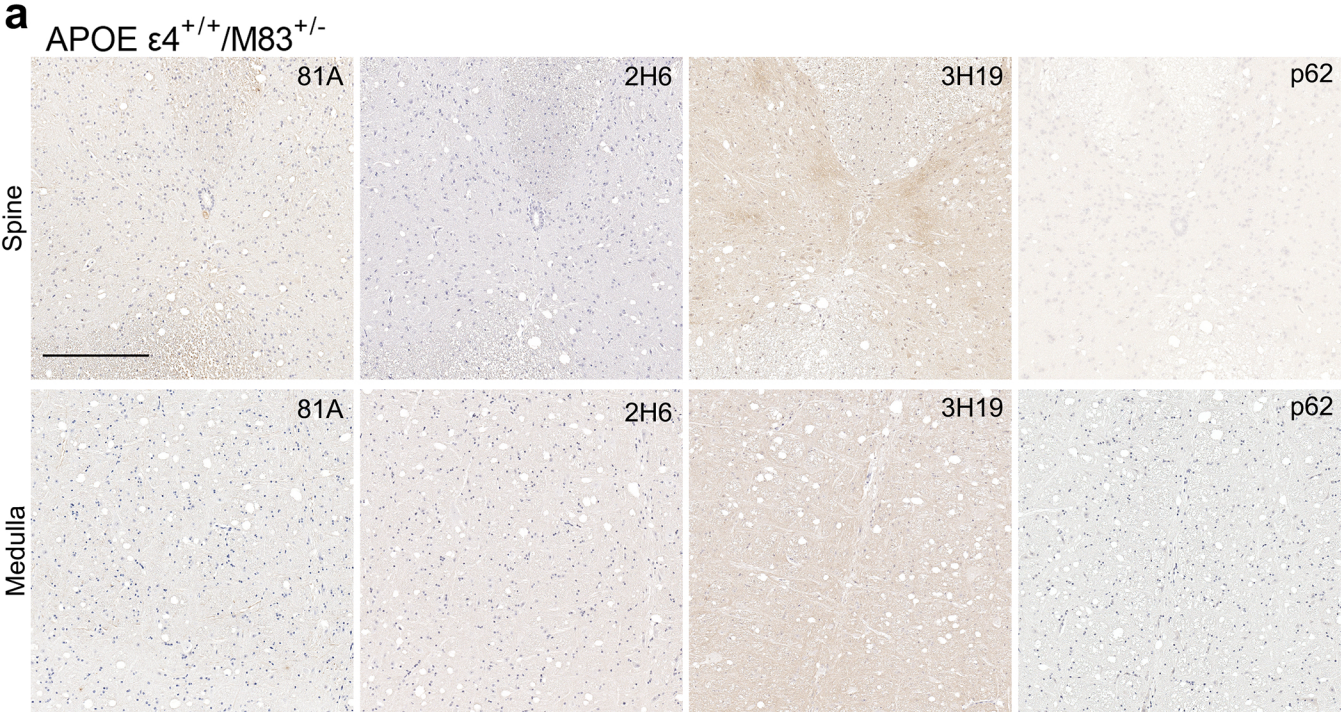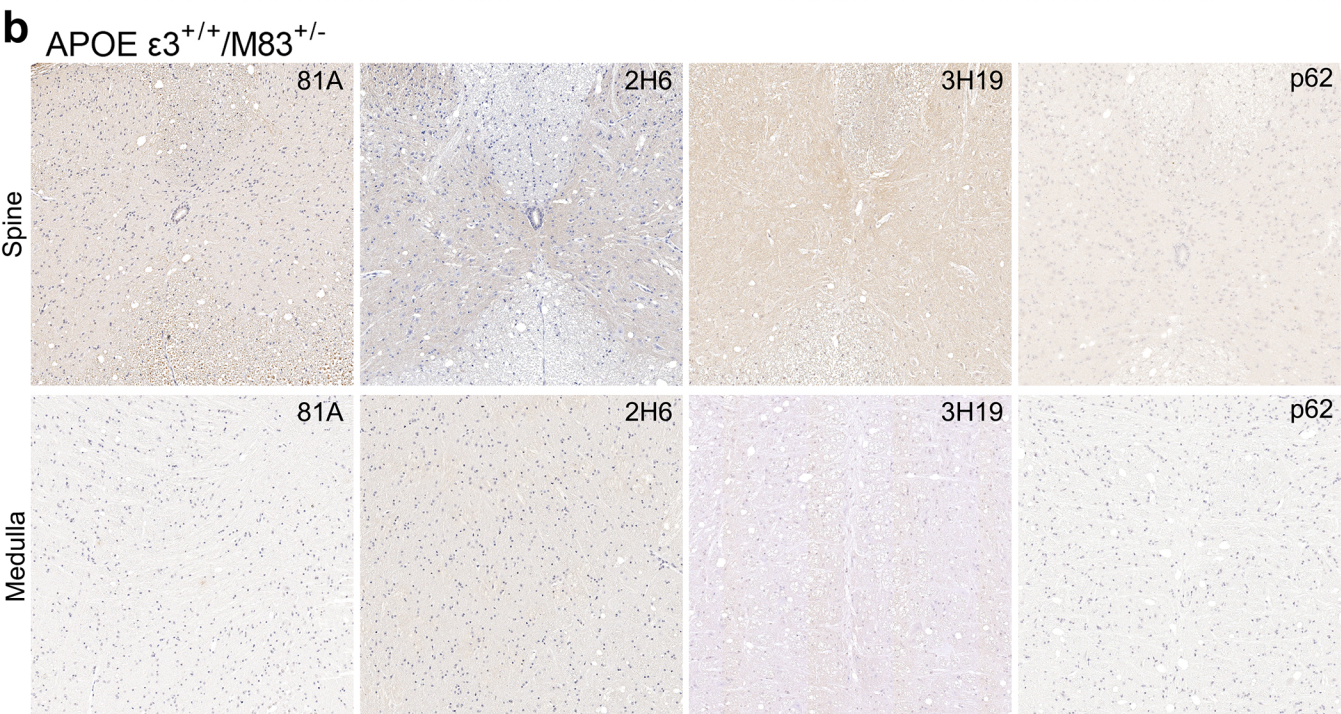

**Supplemental Figure 3**
